1  
2  
3  
4  
5  
6  
7  
8  
9  
10  
11  
12  
13  
14  
15  
16  
17  
18  
19  
20  
21  
22  
23  
24  
25  
26  
27  
28  
29

## **Beyond Words: Non-verbal auditory cognitive impairments in Alzheimer's Disease dementia**

Meher Lad<sup>1\*</sup>, Charlotte Deasy<sup>2</sup>, Christopher J Plack<sup>3,4</sup>, John-Paul Taylor<sup>1,5\*\*</sup>, Timothy D Griffiths<sup>6\*\*</sup>

1. Translational and Clinical Research Institute, Faculty of Medical Sciences, Newcastle University, Newcastle upon Tyne, NE2 4HH
2. Cumbria, Northumberland, Tyne and Wear NHS Foundation Trust
3. Manchester Centre for Audiology and Deafness, The University of Manchester
4. Department of Psychology, Lancaster University
5. Newcastle NIHR Biomedical Research Centre, Newcastle University
6. Biosciences Institute, Newcastle University

\* Corresponding Author

\*\* Joint senior author

## ABSTRACT

30  
31  
32  
33  
34  
35  
36  
37  
38  
39  
40  
41  
42  
43  
44  
45  
46  
47  
48  
49  
50  
51  
52  
53

*Background:* Verbal speech-in-noise (SIN) measures are impaired in early Alzheimer's disease (AD) but may be confounded by linguistic and cultural factors. We investigated whether non-verbal auditory memory could predict cognitive impairment in AD.

*Methods:* We evaluated 158 cognitively healthy individuals, 26 with mild cognitive impairment (MCI), and 28 with AD dementia using the Addenbrooke's Cognitive Examination (ACE-III), pure-tone audiometry, verbal SIN tests, and non-verbal auditory memory tests for basic sound features. Group differences were assessed adjusting for age, sex, and education. Logistic regression and receiver operating characteristic (ROC) analyses compared model fit of verbal and non-verbal auditory variables.

*Results:* All auditory cognition measures were significantly associated with cognition. Non-verbal measures provided a better fit to diagnosis than verbal measures (AIC difference >10), although ROC analyses showed no significant differences between models.

*Conclusions:* Non-verbal auditory measures are effective measures in distinguishing between cognitively healthy, MCI, and AD dementia individuals.

*Keywords:*

hearing, auditory cognition, Alzheimer's disease, biomarkers, non-verbal memory, speech-in-noise

54  
55  
56  
57  
58  
59  
60  
61  
62  
63  
64  
65  
66  
67  
68  
69  
70  
71  
72  
73  
74  
75  
76  
77  
78  
79

## INTRODUCTION

Central hearing impairments can accompany cognitive impairment in Alzheimer's disease (AD) and may precede the onset of dementia [1,2]. The underlying mechanisms linking central hearing and cognitive impairment in AD are not fully understood but some hypotheses suggest that it may relate to overlapping neuroanatomical substrates involved in speech-in-noise (SIN) hearing and neurodegeneration in AD [3]. This overlap implies that central auditory measures could serve as early indicators of neurodegenerative changes in AD, offering an avenue for screening and diagnostic assessments for AD dementia.

Verbal central auditory tasks have been commonly studied in people with AD dementia [4]. These tests commonly use digits, words or sentences as stimuli and performance is determined by a threshold measurement which signifies the ability of a person to correctly identify these on a background of artificial or natural sounds. In the digits-in-noise (DIN) test, a person is usually played three numbers on a background of white noise whereas in a sentence-in-babble test the stimulus consists of a short sentence on a background of multitalker babble. In cross-sectional studies, performance in both of these tasks reduces at a group-level from cognitively healthy to people with mild memory complaints to those with a dementia diagnosis [1]. Poor performance on both of these tests has also been linked to an increased risk of dementia, particularly AD, in independent studies [2,4].

Performance on these tests has been related to neurodegenerative biomarkers underlying the disease process [5]. One cross-sectional study showed an association between cerebrospinal fluid biomarkers of AD and performance on speech-in-noise perception tests. Poor auditory performance was correlated with high total-tau and phosphorylated-tau levels, after statistically adjusting for the effects of age, education, sex APOE4 status and pure-tone audiometry results.

80 Tau deposition in the brain is associated with cognitive impairment in AD and raised  
81 phosphorylated-tau in the cerebrospinal fluid is associated with a greater risk of AD dementia in  
82 the future [6,7]. Although this study was conducted in healthy individuals, this finding suggests a  
83 relationship between central hearing ability and neurobiological processes linked to an  
84 increased risk of AD dementia.

85  
86 Speech-in-noise measures may, however, be confounded by linguistic proficiency, cultural  
87 background and educational attainment. These tests may therefore be less applicable to people  
88 from under-represented groups who are non-native speakers or those with low literacy levels.  
89 Such factors may lead to inaccurate measurements in these populations. Non-verbal measures  
90 of auditory cognition may be able to overcome these issues.

91  
92 We used previously developed auditory cognitive tests to investigate how verbal and non-verbal  
93 metrics related to one another in ageing [8,9]. Auditory memory (the general ability to hold  
94 sound objects in mind) for basic sound features correlated with SIN perception ability as  
95 measured by sentence-in-babble thresholds. Verbal measures of auditory memory are also  
96 important determinants of SIN ability in older adults and those with hearing loss [10]. In previous  
97 work, we have found significant relationships with auditory memory for frequency and  
98 amplitude-modulation rate precision. We used a novel auditory paradigm which measured  
99 auditory memory as a continuous resource that is flexibly distributable to a sound object and  
100 provides a fine-grained measure of memory, rather than conventional discrete measures [11].  
101 Further work established that including these measures in a linear model with educational  
102 attainment and verbal speech-in-noise measures allowed an accurate prediction of cognitive  
103 measures that are widely used as screening tools for dementia diagnosis [8].

104

105 In this study, we test the utility of non-verbal measures only in classifying a diagnosis of AD  
106 diagnosis. We hypothesised that non-verbal measures would be as effective as verbal SIN  
107 measures in distinguishing cognitive status among participants, including those of AD dementia.  
108 Therefore, the objectives of this study were: (1) to assess the utility of non-verbal auditory  
109 cognitive measures in distinguishing between different cognitive statuses associated with AD,  
110 and (2) to compare the effectiveness of non-verbal auditory measures with traditional verbal  
111 speech-in-noise tests in classifying cognitive impairment in AD.

112

113 We found that non-verbal auditory measures are as effective as verbal tests in distinguishing  
114 cognitive status among participants, including those with AD dementia. Non-verbal measures  
115 provided a better statistical fit for classifying cognitive status and were equally effective in  
116 discriminating between cognitively healthy individuals, those with mild cognitive impairment  
117 (MCI) and those with AD dementia. These results suggest that non-verbal auditory cognitive  
118 tests are valuable tools for detecting cognitive impairment associated with AD and may offer a  
119 more inclusive and generalisable approach for early detection and monitoring across diverse  
120 populations.

121

122

## METHODS

123

### 124 *Participants*

125 Participants were recruited from the AudCog study, an ongoing observational study  
126 investigating auditory measures in cognitive health and disease. Inclusion criteria for cognitively  
127 healthy individuals included age between 50 and 85 years, normal cognitive screening scores  
128 (ACE-III  $\geq$  88) and no history of neurological or psychiatric disorders. Participants with MCI and  
129 AD dementia were also recruited and were diagnosed based on established clinical criteria by a  
130 neurologist or psychiatrist with specialist experience in dementia [12].

131

132 Participants were recruited from a variety of sources including local volunteer databases, the  
133 Join Dementia Research register and through the friends and family of patients from Memory  
134 Clinics for cognitively healthy participants. People with MCI and AD dementia were recruited  
135 through local memory and cognitive neurology clinics. In order to maximise diversity, equity and  
136 inclusion, we appealed to all individuals regardless of culture, race, gender or sexual orientation.  
137 A total of 212 participants were recruited: 158 cognitively healthy controls, 26 with MCI, and 28  
138 with AD dementia. Demographic characteristics and auditory measurements are detailed in  
139 Table 1.

140

### 141 *Study Design*

142 This study had a cross-sectional observational design. In-person written consent was obtained  
143 from all participants. All participants had one visit to the Auditory Laboratory at Newcastle  
144 University or a home visit was conducted to the participant's home. After the consenting

145 process, participants underwent a pure-tone audiometric test followed by auditory cognitive  
146 assessment. Finally, the cognitive screening test (described below) was administered. The  
147 recruitment period occurred from March 2022 to March 2024. Ethical approval was obtained  
148 from the Oxford C NHS Research Ethics Committee (21/SC/0139) and written informed consent  
149 was obtained from all participants. The study was performed in accordance with the ethical  
150 standards as laid down in the 1964 Declaration of Helsinki and its later amendments.

151

### 152 *Auditory Assessments*

153 Pure tone audiometry (PTA) testing was performed on both ears from 250 Hz to 8 kHz at octave  
154 intervals for air conduction using an Interacoustics AD629 Diagnostic Audiometer and RadioEar  
155 DD450 circumaural headphones according to British Society of Audiology testing guidelines  
156 [13]. Pure tones were manually presented as short bursts twice starting at 30 dB HL then  
157 increased in 5 dB HL increments until comfortably audible if necessary. Then 5 dB HL  
158 reductions were made until the tone was not audible. This process was repeated twice, and the  
159 lowest audible volume was chosen as the value for a particular frequency. If maximum  
160 amplification at 100 dB HL could not be perceived, then this was used as the ceiling value at a  
161 particular frequency. The overall mean of high frequency values between 4 and 8 kHz for the  
162 best ear was taken as the threshold value for an individual for further analysis. This value was  
163 chosen as high-frequency thresholds are suspected to deteriorate first in age-related hearing  
164 loss and previous research from our group has suggested that PTA thresholds in this range  
165 correlate with speech-in-noise difficulties [14,15].

166

167 People wore Sennheiser Momentum 4 over-ear headphones for central auditory tests. Central  
168 hearing tests included verbal speech-in-noise perception tests using digits (Digits-in-Noise, DIN)  
169 and sentences (Speech-in-Babble, SIB). In these tests, the level difference between speech and  
170 background (white noise for DIN and 16-talker babble for SIB) is varied adaptively until a signal-

171 to-masker ratio (in dB) at speech recognition threshold is obtained for each individual [8].

172 Participants had two practice trials at the beginning of the task to familiarise themselves with the

173 stimuli at an SNR of 10 dB. An adaptive 1-up, 1-down psychophysical paradigm was

174 implemented whereby a correct response resulted in the SNR being reduced and an incorrect

175 one caused the SNR to increase. The starting SNR was 0 dB and the step sizes decreased

176 from 5 to 2 dB after 3 reversals, which then reduced to 0.5 dB after 3 more reversals. The run

177 terminated after 10 reversals and the SNR at the last 5 reversals was averaged to calculate the

178 DIN threshold for each participant. Lower SNR values indicate a better performance. For the

179 DIN task, select the digits they had heard from a keypad shown on the screen. For the SIB task,

180 target sentences had the form <name> <verb> number> <adjective> <noun> (e.g. “Alan

181 gives four pretty flowers”) and participants had to click on the correct word from a list of five

182 columns (10 options for each word) shown on the screen with the same structure.

183

184 Non-verbal auditory tests measure Auditory Memory (AuM) precision for basic sound features

185 over several seconds. These tests are usually self-directed and take approximately 5-10

186 minutes. This tests short-term memory performance for two basic sound features: frequency of

187 pure-tone and temporal fluctuation (modulation rate of amplitude-modulated white noise) [9]. A

188 one-second tone or AM modulated white noise stimulus is presented to a participant after which

189 they are asked to ‘find’ the sound on a horizontal scale on a computer screen. Participants



190 move a mouse and click on the line to produce a sound at that location. They can make as  
191 many clicks as they want with no set time limit. After they were satisfied with their choice, they  
192 would advance to the next trial by pressing the ‘Enter’ key on a keyboard. Frequencies that  
193 determined the pure-tone sounds were chosen from a uniform distribution between 440 and 880  
194 Hz and AM rates for the white noise stimulus were 5–20 Hz with a sinusoidal function used to  
195 apply this modulation. Hanning windows were applied to all synthetic sounds to avoid clicks and  
196 the beginning and end of the stimuli. The task consisted of 32 trials with the frequency and AM  
197 rate matching trials being interleaved. Participants had a short break after 16 trials. A Gaussian  
198 function was used to estimate the standard deviation of the errors in each trial across the whole  
199 experiment and the inverse of this value, the precision, was used for further analysis. Thus, one  
200 obtains precision scores for frequency AuM (AuMF) and AM rate AuM (AuMA). Studies in vision  
201 have found that this measure better reflects the memory resource a participant can allocate in a  
202 given task [16]. Participants had two practice trials with each stimulus (2 for frequency and 2 for  
203 AM rate AuM) at the beginning of the task to familiarise themselves with the stimuli.

204

### 205 *Cognitive Assessment*

206 All participants underwent a cognitive screening test using the Addenbrooke’s Cognitive  
207 Examination 3rd Edition (ACE-III). A score of 88 is commonly used to delineate cognitive  
208 impairment [17]. The ACE-III demonstrated variable sensitivity (ranging from 82% to 97% for  
209 dementia at thresholds of 82 and 88) and specificity (ranging from 4% to 77% for dementia)  
210 across different thresholds and patient populations, with more variability observed in specificity.

211

### 212 *Statistical analysis*

213 All variable data were checked for normality by visually examining their distributions. AuM  
214 values were log-transformed to achieve normality. Mean and standard deviation (SD) values  
215 were calculated using absolute values in order to facilitate comparison between groups using an

216 Analysis of Variance (ANOVA). To assess group differences across cognitive and auditory  
217 measures, one-way ANOVA was performed for each outcome variable: adjusted ACE-III total  
218 score, DIN, SIB, AuMF and AuMA z-scores. Each ANOVA tested for differences across three  
219 cognitive groups: Cognitively Healthy (CN), MCI, and AD Dementia. Post-hoc analyses using  
220 Tukey's HSD test were conducted to explore pairwise group differences where applicable. All  
221 analyses controlled for age, sex at birth, and educational status, and significance was set at  $p <$   
222 0.05. To aid analysis using linear models, these values were standardised using z-scores.

223  
224 Multinomial logistic regression models were used to assess the association between the non-  
225 verbal auditory measures and clinical diagnosis, using age, sex and educational attainment as  
226 regressors of no interest. In order to compare this model to one created using verbal measures,  
227 we used Bayesian Model Comparison: Model 1 with the DIN and SIB tests and Model 2 with  
228 AuMF and AuMA. We used the Akaike Information Criterion (AIC) to define the best model. A  
229 lower AIC with a difference of 2 from the other model was used to define an informative model  
230 with parsimonious degrees of freedom. The models were also evaluated and compared (using  
231 bootstrapped confidence intervals) for classification accuracy for diagnosis using Receiver  
232 Operator Characteristic (ROC) curves.

233  
234 All statistical analyses were conducted using Python programming language within Jupyter  
235 notebooks and Visual Studio Code environments. We utilised several Python libraries to  
236 perform data processing and statistical modelling. Specifically, we employed statsmodels for  
237 implementing multinomial logistic regression models and assessing model parameters. The  
238 patsy library was used for creating design matrices necessary for the regression analyses. To  
239 evaluate multicollinearity among predictors, we calculated the Variance Inflation Factor using  
240 functions from statsmodels.stats.outliers\_influence. For data preprocessing, including  
241 standardisation and label binarization, we used functions from scikit-learn (sklearn), specifically

242 the preprocessing module. The dataset was split into training and testing subsets using  
243 `train_test_split` from `sklearn.model_selection`. Multinomial logistic regression models were  
244 implemented using `OneVsRestClassifier` and `LogisticRegression` from `sklearn.linear_model`.  
245 Receiver Operating Characteristic (ROC) curves were generated, and the Area Under the Curve  
246 (AUC) values were calculated using functions from `sklearn.metrics`. This allowed us to assess  
247 the discriminative power of the verbal and non-verbal auditory measures in classifying cognitive  
248 status.  
249  
250

251

## RESULTS

252

253 As shown in Table 1, cognitively healthy people were younger and better educated than those  
254 with mild cognitive impairment or AD dementia and therefore these measures were used as  
255 regressors of no interest along with sex at birth. Cognitive scores on the ACE-III also decreased  
256 from cognitively normal to mild cognitively impaired people to people with a diagnosis of AD  
257 dementia. Adjusted pure-tone audiometric thresholds did not differ between groups. The  
258 unadjusted average audiograms for each group are shown in Figure 1.

259

260 Statistical analysis revealed significant differences in cognitive and auditory performance across  
261 groups (Figure 2). ANOVA results showed that ACE-III total scores differed significantly  
262 between groups ( $F(2, 203) = 325.47, p < 0.0001$ ), with lower scores in the MCI and AD groups  
263 compared to cognitively healthy participants. Similarly, significant group differences were  
264 observed in auditory measures: DIN ( $F(2, 203) = 9.24, p < 0.001$ ), SIB ( $F(2, 203) = 45.63, p <$   
265  $0.001$ ), AuMF ( $F(2, 203) = 14.57, p < 0.0001$ ), and AuMA ( $F(2, 203) = 28.43, p < 0.001$ ). Figure  
266 3 further highlights significant correlations between the ACE-III total score and auditory  
267 measures. Strong correlations were observed for both verbal (SIB;  $r = 0.74, p < 0.001$ ) and non-  
268 verbal measures (AuMA;  $r = 0.58, p < 0.001$ ), indicating that auditory processing, both verbal  
269 and non-verbal, declines in parallel with cognitive impairment.

270

271 We conducted multinomial logistic regression analyses to compare the effectiveness of verbal  
272 and non-verbal auditory measures in distinguishing between cognitively normal, mild cognitive  
273 impairment, and AD dementia groups. Model 1, which included verbal measures, explained  
274 26% of the variance in cognitive status (Log-likelihood: -110.56, AIC: 247). Within this model,  
275 SIB had the largest effect on both mild cognitive impairment and AD dementia, indicating its  
276 strong association with cognitive impairment. Model 2 focused on non-verbal measures and

277 demonstrated a better fit, explaining 32% of the variance (Log-likelihood: -100.99, AIC: 228). In  
278 this model, auditory memory for amplitude modulation rate had the largest effect size,  
279 significantly associated with both mild cognitively impaired people and people with AD  
280 dementia. The comparison of AIC values suggests that the non-verbal measures model (Model  
281 2) provided a statistically better fit than the verbal measures model (Model 1).

282  
283 To further assess the discriminative power of the verbal and non-verbal auditory measures,  
284 ROC curve analysis was performed, and the Area Under the Curve (AUC) values were  
285 calculated for each model (Figure 1). The verbal measures model produced AUCs of 0.85 for  
286 cognitively healthy, 0.78 for mild cognitively impaired people, and 0.82 for people with AD  
287 dementia, indicating a high level of accuracy in distinguishing between the cognitive groups.  
288 Similarly, the non-verbal measures model yielded AUCs of 0.83 for cognitively healthy, 0.79 for  
289 mild cognitively impaired people, and 0.80 for people with AD dementia, demonstrating that  
290 non-verbal measures were equally effective in classifying cognitive status. The comparative  
291 analysis of the ROC curves showed no significant difference in the AUC values between the  
292 verbal and non-verbal models ( $p > 0.05$ ), suggesting that non-verbal auditory tests are as  
293 effective as verbal tests in identifying cognitive impairment.

294

295

296 *Table 1*  
 297 **Demographic and Auditory Characteristics**  
 298

|                                             | Cognitively Healthy<br>(n = 158) | Mild Cognitive<br>Impairment<br>(n=26) | Alzheimer's Disease<br>Dementia<br>(n=28) |
|---------------------------------------------|----------------------------------|----------------------------------------|-------------------------------------------|
| <i>Demographic</i>                          |                                  |                                        |                                           |
| Age, mean (SD)                              | 67.0 (9.5)                       | 73.2 (6.9)                             | 75.2 (5.1)                                |
| Female, n (%)                               | 96 (62)                          | 16 (62)                                | 9 (38)                                    |
| Advanced education, n (%)                   | 31 (20)                          | 4 (15)                                 | 1 (4)                                     |
| Hearing aid use, n (%)                      | 23 (15)                          | 4 (15)                                 | 7 (29)                                    |
| <i>Cognition</i>                            |                                  |                                        |                                           |
| ACE-III, mean/100 (SD)                      | 96 (3)                           | 84 (6)                                 | 73 (9)                                    |
| <i>Hearing measures</i>                     |                                  |                                        |                                           |
| Adjusted PTA threshold,<br>mean, dB HL (SD) | 44.8 (20)                        | 46.6 (17)                              | 40.6 (16)                                 |
| DIN threshold, dB (SD)                      | -8.9 (4.1)                       | -7.5 (3.6)                             | -4.2 (2.9)                                |
| SIB threshold, dB (SD)                      | -6.9 (3.4)                       | -3.4 (6.9)                             | -0.5 (7.9)                                |
| AuMF, au (SD)                               | 0.29 (0.2)                       | 0.13 (0.1)                             | 0.09 (0.1)                                |
| AuMA, au (SD)                               | 0.08 (0.03)                      | 0.05 (0.03)                            | 0.04 (0.02)                               |

299  
 300 Abbreviations: ACE-III, Addenbrooke's Cognitive Examination (3rd Edition); au, arbitrary units; AuMA,  
 301 Auditory Memory for Amplitude Modulation rate; AuMF, Auditory Memory for Frequency; DIN, Digits-in-  
 302 Noise test; SIB, Speech-in-Babble test; PTA, Pure Tone Audiometry.

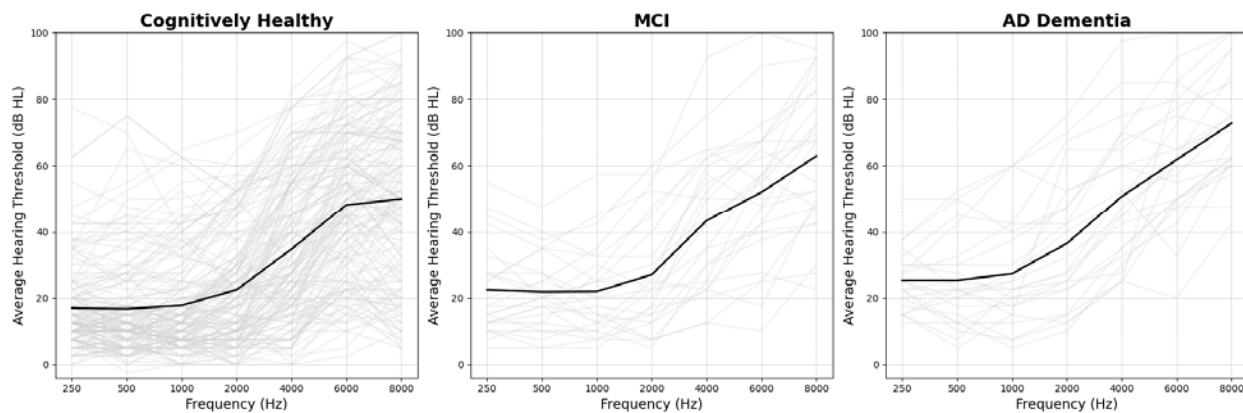

303

304

305 **Figure 1.** *Pure-tone audiogram results for cognitively healthy, Mild Cognitive Impairment (MCI) and*

306 *Alzheimer's Disease (AD) dementia groups.* The figure presents the unadjusted averaged hearing

307 thresholds (dB HL) across frequencies (250–8000 Hz) for three cognitive groups: Cognitively Healthy,

308 MCI, and AD Dementia. Individual participants' audiograms are shown as translucent grey lines, while the

309 group average for each frequency is represented by a solid black line. Hearing thresholds are averaged

310 between the left and right ears for each participant. This figure illustrates a general trend of increasing

311 hearing impairment with higher frequencies across all groups.

312

313

314  
315  
316  
317  
318  
319  
320  
321  
322  
323  
324  
325  
326  
327  
328  
329  
330  
331

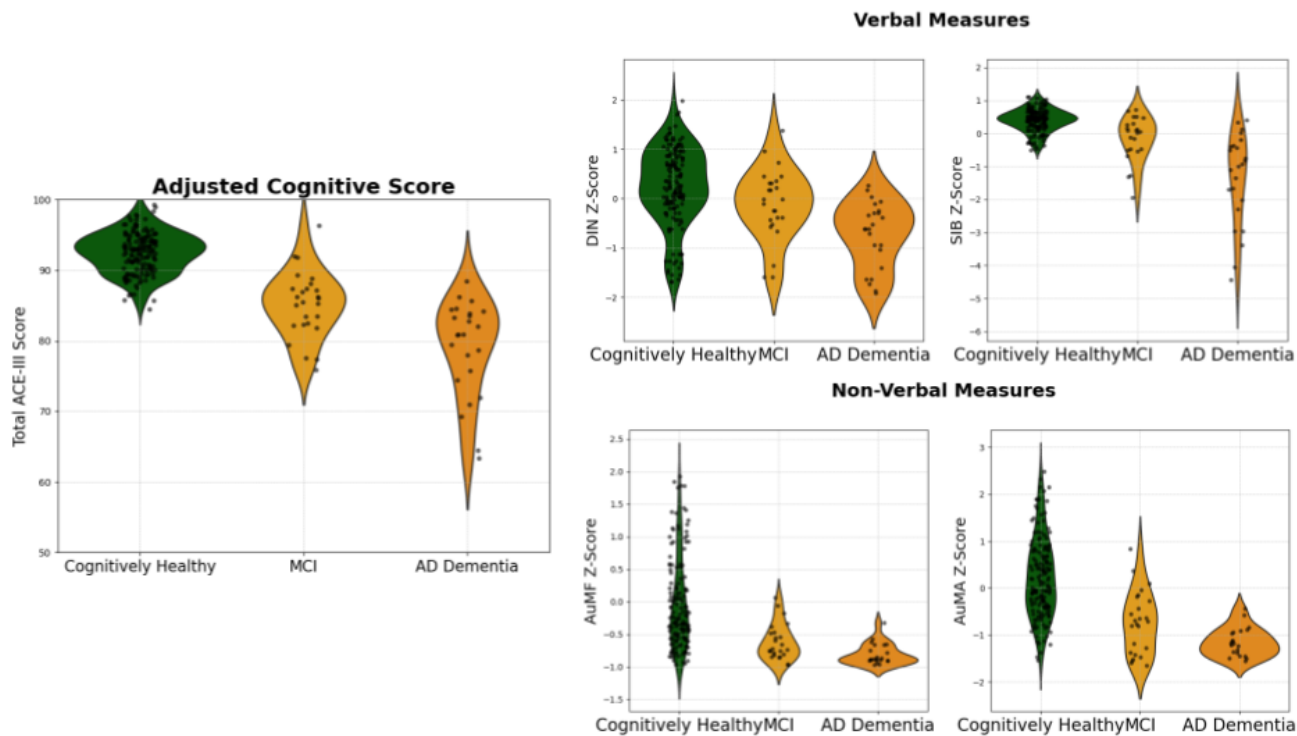

332 **Figure 2.** *Cognitive and auditory measure distributions by participant group.* The left panel shows the  
333 adjusted ACE-III total scores for three cognitive groups: Cognitively Healthy (CN), Mild Cognitive  
334 Impairment (MCI), and Alzheimer's Dementia (AD). The right panel is split into two sections: Verbal  
335 Measures (top) and Non-Verbal Measures (bottom). The Verbal Measures display violin plots for the  
336 Digits in Noise (DIN) and Speech in Babble (SIB) z-scores, while the Non-Verbal Measures show  
337 distributions for Auditory Memory for Frequency (AuMF) and Auditory Memory for Amplitude Modulation  
338 (AuMA) z-scores. Each plot visualises the distribution of individual scores within each cognitive group,  
339 with individual data points overlaid in black.



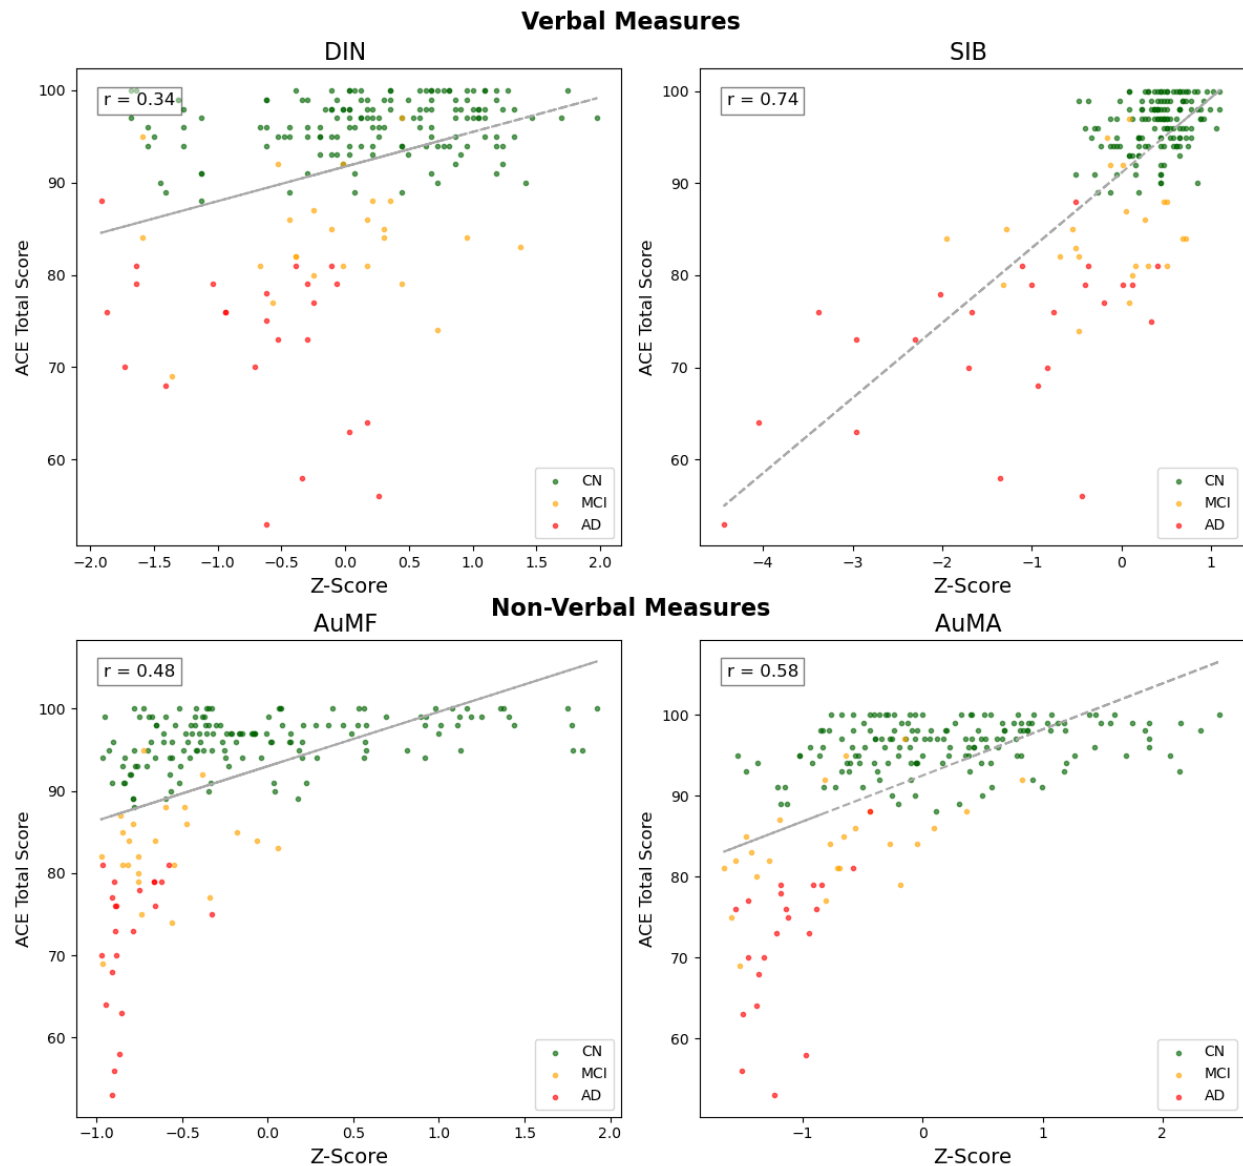

340  
341 **Figure 3.** Correlations between cognitive and auditory measures and ACE-III total score. This figure  
342 shows scatterplots of four cognitive and auditory measures, grouped by cognitive status (Cognitively  
343 Healthy (CN), Mild Cognitive Impairment (MCI), Alzheimer's Disease (AD) dementia) and their  
344 relationship with the ACE-III total score. The upper row (Verbal Measures) presents the associations for  
345 the Digits in Noise (DIN) and Speech in Babble (SIB) z-scores, while the lower row (Non-Verbal  
346 Measures) presents the associations for Auditory Memory for Frequency (AuMF) and Auditory Memory  
347 for Amplitude Modulation (AuMA) z-scores. Trendlines (dark grey) highlight the correlations, with  
348 corresponding r-values displayed in each subplot. All correlations were statistically significant with  $p <$   
349 0.001.

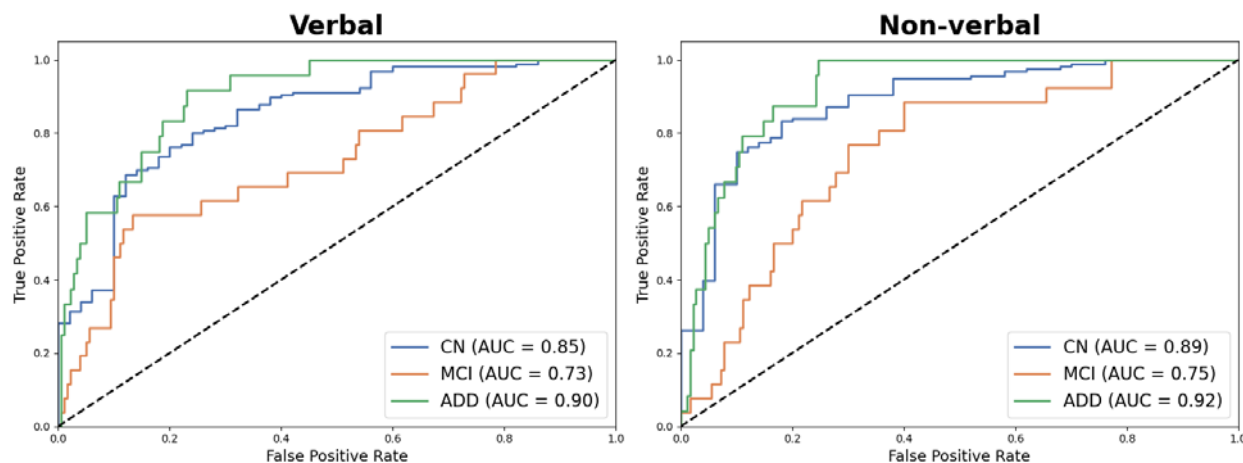

350

351

352 **Figure 4.** Receiver Operating Characteristic (ROC) Curves for Verbal and Non-Verbal Auditory Measures

353 in Discriminating Cognitive Status. The figure displays the ROC curves for two multinomial logistic

354 regression models used to differentiate between cognitively normal (CN), mild cognitive impairment (MCI)

355 and Alzheimer's disease dementia (ADD) groups based on auditory performance. The leftward image

356 represents the model using verbal auditory measures, specifically the digits-in-noise performance and

357 sentence-in-babble threshold. The rightward image shows the model using non-verbal auditory

358 measures, including auditory memory for frequency and auditory memory for amplitude modulation rate.

359 Each ROC curve corresponds to the classification of one cognitive status group (CN, MCI, ADD). The

360 area under the curve (AUC) values are reported for each ROC curve, indicating the model's ability to

361 correctly classify people across cognitive statuses. Both verbal and non-verbal models demonstrate

362 similar AUC values, suggesting that non-verbal auditory measures are as effective as verbal measures in

363 associating with cognitive impairment.

364  
365  
366  
367  
368  
369  
370  
371  
372  
373  
374  
375  
376  
377  
378  
379  
380  
381  
382  
383  
384  
385  
386  
387  
388  
389

## DISCUSSION

We demonstrate that simple non-verbal measures of auditory cognition are significantly associated with cognitive impairment in AD and can effectively discriminate between individuals with and without AD dementia. Auditory memory is linked to cognition across the AD spectrum and, when combined with demographic factors, can classify a clinical diagnosis. These findings lay the groundwork for future investigations into auditory memory as a potential measure of brain function, alongside fluid biomarkers that are sensitive and specific to AD, offering a more inclusive and accessible diagnostic tool.

Previous clinical observations in individuals with AD dementia have highlighted an aversion or heightened sensitivity to sound processing, particularly in noisy environments. However, detailed evaluations of these symptoms using non-verbal auditory paradigms are only now beginning to emerge [18]. Our results align with prior research showing impairments in auditory scene analysis and spatial processing when using complex sound stimuli [19,20]. Additionally, this study extends our understanding of non-verbal auditory cognition beyond individuals without dementia to those experiencing memory and cognitive difficulties due to AD dementia.

Auditory memory is a crucial cognitive ability that supports SIN perception, particularly as one ages [10,21]. Successful SIN perception requires the listener to attend to the correct auditory stream, track it and remember it over time despite interference from competing sounds. This process likely involves several cognitive factors. Previous research suggests that phonological auditory memory becomes increasingly important as individuals age and experience hearing loss [21]. While the underlying reasons for this are unclear, they may be related to the increased working memory resources required to comprehend sentences in noisy environments when perceptual systems are partially degraded.

390

391 The auditory memory precision measure, which is based on a continuous scale rather than  
392 conventional discrete phonological measures, has been shown to reflect the total memory  
393 'resource' an individual can allocate to a given task [16]. The specific reasons for the  
394 associations between SIN perception and auditory memory for features such as frequency  
395 precision and amplitude modulation rates remain uncertain. This may relate to the evolutionary  
396 importance of humans tracking the source of a sound object e.g. voices, where frequency is  
397 particularly important and the natural modulations that occur in the envelope of speech sounds  
398 (which were similar to the rates used as stimuli in this study) [22–24].

399

400 The reasons for specific associations with auditory memory and cognition in AD have also not  
401 yet been thoroughly investigated. Some hypotheses propose that non-verbal measures of  
402 auditory memory link speech-in-noise perception ability and cognition in AD due to their  
403 neuroanatomical substrates [3]. Performing these tasks is known to activate medial temporal  
404 lobe structures, regions implicated in the early stages of AD pathology [25,26]. Degeneration of  
405 these structures could impair auditory memory and contribute to cognitive deficits detected by  
406 other screening tools. Additionally, damage to these areas, regardless of aetiology, can similarly  
407 affect performance in visual cognitive tasks [27,28]. It is also important to recognise that hearing  
408 function, age and brain neuropathology independently influence cognition and may collectively  
409 contribute to cognitive decline in AD [29].

410

411 This study benefits from incorporating both peripheral and detailed central auditory testing in  
412 individuals with and without dementia. Including such comprehensive measures is crucial, as a  
413 combination of peripheral and central auditory assessments may provide a more complete  
414 understanding of the neurobiological link between hearing and dementia. Previous studies  
415 relying solely on pure-tone audiograms or subjective measures have not consistently

416 demonstrated relationships with the underlying neurobiological processes in AD [30,31]. This  
417 contrasts with some work using central measures [5]. Central auditory measures may also help  
418 clarify whether hearing aids can prevent or delay dementia. The lack of success in trials using  
419 hearing aids as an intervention may be due to their limited effectiveness in individuals with  
420 central auditory impairments, suggesting that hearing aids might be most beneficial for those  
421 without central auditory dysfunction [32].

422  
423 Limitations of this study include the relatively small sample size of cognitively impaired  
424 individuals, the cross-sectional design and the lack of neurodegenerative biomarkers to  
425 characterise the participants. The progression of cognitive impairment in ageing is known to  
426 vary based on biomarker status and future work should incorporate these *in-vivo* markers to  
427 provide a more comprehensive understanding of the relationship between auditory cognition  
428 and AD progression [33]. While participants with normal cognitive function were younger and  
429 had higher education levels than other groups, these factors were statistically controlled for in  
430 the analyses. Future studies should aim to include more diverse populations, as these auditory  
431 measures are applicable across various cultural and linguistic backgrounds. Longitudinal  
432 research is also necessary to determine whether auditory cognition measures can predict the  
433 onset or progression of AD dementia, particularly in preclinical or mildly impaired individuals.

434  
435 This work showcases simple non-verbal auditory stimuli which could potentially be used  
436 alongside clinical and neurodegenerative biomarkers for screening and monitoring cognitive  
437 impairment due to AD. These measures are potentially less susceptible to confounding factors  
438 such as linguistic and cultural differences, offering a broader applicability in diverse populations.  
439 Additionally, their suitability for use in remote or resource-limited settings enhances their  
440 practical utility [34]. Further work is necessary to see whether these non-verbal auditory tasks,  
441 like verbal SIN measures, can predict AD dementia, particularly in individuals with MCI [2].

442 Studying auditory memory alongside highly sensitive and specific fluid biomarkers of AD, such  
443 as phosphorylated-Tau, would explain whether poor auditory cognition is a harbinger of  
444 dementia [6]. Auditory cognition may also be associated with more general markers of  
445 neurodegeneration, such as cortical thinning, detectable through neuroimaging. Urgent work is  
446 required to investigate the relationship between auditory cognitive decline and these  
447 neuroimaging metrics [35].

448  
449 In conclusion, this study demonstrates that non-verbal auditory memory tasks are strongly  
450 associated with cognitive impairment in Alzheimer's disease and show potential as early  
451 indicators of cognitive decline. These tasks, particularly when combined with demographic  
452 factors, could help distinguish AD dementia from normal cognitive ageing. The findings suggest  
453 that non-verbal auditory measures tap into neural processes that are particularly vulnerable to  
454 early AD pathology, especially in medial temporal lobe structures. Further longitudinal studies  
455 incorporating auditory cognition, fluid biomarkers and neuroimaging are essential to clarify the  
456 role of auditory memory in predicting dementia and to explore whether these measures could  
457 enhance early detection or improve the monitoring of AD progression.

458

### **Acknowledgements**

459 The authors would like to thank all the participants and their carers for participating in this  
460 research.

461

462

### **Sources of Funding and Disclosures**

463 The authors have no conflicts of interests or competing interests to declare. Data is available  
464 upon request to the corresponding author. ML has received funding from the Guarantors of  
465 Brain (Brain Entry Fellowship) and Medical Research Council (MR/V006568/1) in the United  
466 Kingdom. CJP receives funding from the National Institute for Health and Care Research  
467 Manchester Biomedical Research Centre (NIHR203308). JT receives funding and support from  
468 the National Institute for Health Research Biomedical Research Centre (NIHR203309), United  
469 Kingdom in Newcastle upon Tyne. TG receives funding from the Medical Research Council  
470 (MR/T032553/1), Wellcome Trust (WT106964MA) and National Institute on Deafness and Other  
471 Communication Disorders (DC000242 36).

472

473

### **Contributors**

474 ML conceived the study. ML collected and analysed the data. ML drafted the initial manuscript.  
475 All authors contributed to revision and editing of the manuscript.

476 **References**

477

- 478 [1] Gates GA, Anderson ML, Feeney MP, McCurry SM, Larson EB. Central Auditory  
479 Dysfunction in Older Persons With Memory Impairment or Alzheimer Dementia. *Arch*  
480 *Otolaryngol Neck Surg* 2008;134:771–7. <https://doi.org/10.1001/archotol.134.7.771>.
- 481 [2] Stevenson JS, Clifton L, Kuźma E, Littlejohns TJ. Speech-in-noise hearing impairment is  
482 associated with an increased risk of incident dementia in 82,039 UK Biobank participants.  
483 *Alzheimers Dement J Alzheimers Assoc* 2022;18:445–56.  
484 <https://doi.org/10.1002/alz.12416>.
- 485 [3] Griffiths TD, Lad M, Kumar S, Holmes E, McMurray B, Maguire EA, et al. How Can  
486 Hearing Loss Cause Dementia? *Neuron* 2020;108:401–12.  
487 <https://doi.org/10.1016/j.neuron.2020.08.003>.
- 488 [4] Mohammed A, Gibbons LE, Gates G, Anderson ML, McCurry SM, McCormick W, et al.  
489 Association of Performance on Dichotic Auditory Tests With Risk for Incident Dementia  
490 and Alzheimer Dementia. *JAMA Otolaryngol-- Head Neck Surg* 2022;148:20–7.  
491 <https://doi.org/10.1001/jamaoto.2021.2716>.
- 492 [5] Tuwaig M, Savard M, Jutras B, Poirier J, Collins DL, Rosa-Neto P, et al. Deficit in Central  
493 Auditory Processing as a Biomarker of Pre-Clinical Alzheimer's Disease. *J Alzheimers Dis*  
494 2017;60:1589–600. <https://doi.org/10.3233/JAD-170545>.
- 495 [6] Palmqvist S, Tideman P, Cullen N, Zetterberg H, Blennow K, Alzheimer's Disease  
496 Neuroimaging Initiative, et al. Prediction of future Alzheimer's disease dementia using  
497 plasma phospho-tau combined with other accessible measures. *Nat Med* 2021;27:1034–  
498 42. <https://doi.org/10.1038/s41591-021-01348-z>.
- 499 [7] Bejanin A, Schonhaut DR, La Joie R, Kramer JH, Baker SL, Sosa N, et al. Tau pathology  
500 and neurodegeneration contribute to cognitive impairment in Alzheimer's disease. *Brain J*  
501 *Neurol* 2017;140:3286–300. <https://doi.org/10.1093/brain/awx243>.
- 502 [8] Lad M, Taylor J-P, Griffiths TD. The contribution of short-term memory for sound features  
503 to speech-in-noise perception and cognition. *Hear Res* 2024;451:109081.  
504 <https://doi.org/10.1016/j.heares.2024.109081>.
- 505 [9] Lad M, Holmes E, Chu A, Griffiths TD. Speech-in-noise detection is related to auditory  
506 working memory precision for frequency. *Sci Rep* 2020;10:13997.  
507 <https://doi.org/10.1038/s41598-020-70952-9>.
- 508 [10] Akeroyd MA. Are individual differences in speech reception related to individual differences  
509 in cognitive ability? A survey of twenty experimental studies with normal and hearing-  
510 impaired adults. *Int J Audiol* 2008;47 Suppl 2:S53-71.  
511 <https://doi.org/10.1080/14992020802301142>.
- 512 [11] Joseph S, Teki S, Kumar S, Husain M, Griffiths TD. Resource allocation models of auditory  
513 working memory. *Brain Res* 2016;1640:183–92.  
514 <https://doi.org/10.1016/j.brainres.2016.01.044>.
- 515 [12] McKhann GM, Knopman DS, Chertkow H, Hyman BT, Jack CR, Kawas CH, et al. The  
516 diagnosis of dementia due to Alzheimer's disease: recommendations from the National  
517 Institute on Aging-Alzheimer's Association workgroups on diagnostic guidelines for  
518 Alzheimer's disease. *Alzheimers Dement J Alzheimers Assoc* 2011;7:263–9.  
519 <https://doi.org/10.1016/j.jalz.2011.03.005>.
- 520 [13] British Society of Audiology. Pure-tone air-conduction and boneconduction threshold  
521 audiometry with and without masking 2018.
- 522 [14] Holmes E, Griffiths TD. 'Normal' hearing thresholds and fundamental auditory grouping  
523 processes predict difficulties with speech-in-noise perception. *Sci Rep* 2019;9:1–11.  
524 <https://doi.org/10.1038/s41598-019-53353-5>.
- 525 [15] TI W, R C, L C, Dm N, KJ C. Changes in hearing thresholds over 10 years in older adults. J



- 526 Am Acad Audiol 2008;19. <https://doi.org/10.3766/jaaa.19.4.2>.
- 527 [16] Ma WJ, Husain M, Bays PM. Changing concepts of working memory. *Nat Neurosci*  
528 2014;17:347–56. <https://doi.org/10.1038/nn.3655>.
- 529 [17] Beishon LC, Batterham AP, Quinn TJ, Nelson CP, Panerai RB, Robinson T, et al.  
530 Addenbrooke's Cognitive Examination III (ACE-III) and mini-ACE for the detection of  
531 dementia and mild cognitive impairment. *Cochrane Database Syst Rev*  
532 2019;2019:CD013282. <https://doi.org/10.1002/14651858.CD013282.pub2>.
- 533 [18] Fletcher PD, Downey LE, Golden HL, Clark CN, Slattery CF, Paterson RW, et al. Auditory  
534 hedonic phenotypes in dementia: A behavioural and neuroanatomical analysis. *Cortex*  
535 2015;67:95–105. <https://doi.org/10.1016/j.cortex.2015.03.021>.
- 536 [19] Goll JC, Kim LG, Ridgway GR, Hailstone JC, Lehmann M, Buckley AH, et al. Impairments  
537 of auditory scene analysis in Alzheimer's disease. *Brain J Neurol* 2012;135:190–200.  
538 <https://doi.org/10.1093/brain/awr260>.
- 539 [20] Golden HL, Nicholas JM, Yong KXX, Downey LE, Schott JM, Mummery CJ, et al. Auditory  
540 spatial processing in Alzheimer's disease. *Brain J Neurol* 2015;138:189–202.  
541 <https://doi.org/10.1093/brain/awu337>.
- 542 [21] Füllgrabe C, Rosen S. On The (Un)importance of Working Memory in Speech-in-Noise  
543 Processing for Listeners with Normal Hearing Thresholds. *Front Psychol* 2016;7:1268.  
544 <https://doi.org/10.3389/fpsyg.2016.01268>.
- 545 [22] Assmann PF, Summerfield Q. The contribution of waveform interactions to the perception  
546 of concurrent vowels. *J Acoust Soc Am* 1994;95:471–84. <https://doi.org/10.1121/1.408342>.
- 547 [23] Oxenham AJ. Pitch Perception. *J Neurosci* 2012;32:13335–8.  
548 <https://doi.org/10.1523/JNEUROSCI.3815-12.2012>.
- 549 [24] Goswami U. Speech rhythm and language acquisition: an amplitude modulation phase  
550 hierarchy perspective. *Ann N Y Acad Sci* 2019;1453:67–78.  
551 <https://doi.org/10.1111/nyas.14137>.
- 552 [25] Kumar S, Joseph S, Gander PE, Barascud N, Halpern AR, Griffiths TD. A Brain System for  
553 Auditory Working Memory. *J Neurosci Off J Soc Neurosci* 2016;36:4492–505.  
554 <https://doi.org/10.1523/JNEUROSCI.4341-14.2016>.
- 555 [26] Kumar S, Gander PE, Berger JI, Billig AJ, Nourski KV, Oya H, et al. Oscillatory correlates  
556 of auditory working memory examined with human electrocorticography. *Neuropsychologia*  
557 2020;150:107691. <https://doi.org/10.1016/j.neuropsychologia.2020.107691>.
- 558 [27] Borders AA, Ranganath C, Yonelinas AP. The hippocampus supports high-precision  
559 binding in visual working memory. *Hippocampus* 2022;32:217–30.  
560 <https://doi.org/10.1002/hipo.23401>.
- 561 [28] Zokaei N, Nour MM, Sillence A, Drew D, Adcock J, Stacey R, et al. Binding deficits in  
562 visual short-term memory in patients with temporal lobe lobectomy. *Hippocampus*  
563 2019;29:63–7. <https://doi.org/10.1002/hipo.22998>.
- 564 [29] Kirschen RM, Leaver AM. Hearing function moderates age-related changes in brain  
565 morphometry in the HCP Aging cohort. *BioRxiv Prepr Serv Biol* 2024:2024.04.22.590589.  
566 <https://doi.org/10.1101/2024.04.22.590589>.
- 567 [30] Sarant JZ, Harris DC, Busby PA, Fowler C, Frupp J, Masters CL, et al. No Influence of Age-  
568 Related Hearing Loss on Brain Amyloid- $\beta$ . *J Alzheimers Dis JAD* 2022;85:359–67.  
569 <https://doi.org/10.3233/JAD-215121>.
- 570 [31] Lad M, Taylor J-P, Griffiths TD, Alzheimer's Disease Neuroimaging Initiative. Subjective  
571 hearing loss is not associated with an increased risk of Alzheimer's disease dementia.  
572 *Heliyon* 2024;10:e30423. <https://doi.org/10.1016/j.heliyon.2024.e30423>.
- 573 [32] Lin FR, Pike JR, Albert MS, Arnold M, Burgard S, Chisolm T, et al. Hearing intervention  
574 versus health education control to reduce cognitive decline in older adults with hearing loss  
575 in the USA (ACHIEVE): a multicentre, randomised controlled trial. *The Lancet*  
576 2023;402:786–97. [https://doi.org/10.1016/S0140-6736\(23\)01406-X](https://doi.org/10.1016/S0140-6736(23)01406-X).

- 577 [33] Hansson O. Biomarkers for neurodegenerative diseases. *Nat Med* 2021;27:954–63.  
578 <https://doi.org/10.1038/s41591-021-01382-x>.
- 579 [34] Lad M, Taylor J-P, Griffiths T. Reliable Online Auditory Cognitive Testing: An observational  
580 study 2024:2024.09.17.24313794. <https://doi.org/10.1101/2024.09.17.24313794>.
- 581 [35] Bakkour A, Morris JC, Wolk DA, Dickerson BC. The effects of aging and Alzheimer's  
582 disease on cerebral cortical anatomy: Specificity and differential relationships with  
583 cognition. *NeuroImage* 2013;76:332–44. <https://doi.org/10.1016/j.neuroimage.2013.02.059>.  
584  
585  
586  
587
